# Supplementary material
Source: PubMed Central journal article supplement (PMC2042215)
Supplement: pnas_0705273104_1.pdf [file pnas_0705273104_1.pdf]

**Table 1. NB's neuropsychological assessment results**

|                                                    | Postoperative scores |            |
|----------------------------------------------------|----------------------|------------|
|                                                    | Score                | Percentile |
| Wechsler Abbreviated Scale of Intelligence (WASI)* |                      |            |
| IQ-Full Scale                                      | 118                  | 88         |
| IQ- Verbal                                         | 115                  | 84         |
| IQ- Nonverbal                                      | 118                  | 88         |
| Wechsler Memory Scale-Third Edition (WMS-III)**    |                      |            |
| Immediate Auditory (Verbal) Memory Index           | 127                  | 96         |
| WMS III Auditory Delayed Index (Recall)            | 128                  | 97         |
| WMS III Auditory Recognition Delayed Index         | 130                  | 98         |
| WMS III – Stories Recall                           | 43/50                | --         |
| WMS III – Stories Recog                            | 30/30                | --         |
| WMS III – Word Pairs Recall                        | 8/8                  | --         |
| WMS III – Word Pairs Recog                         | 24/24                | --         |
| CVLT*** Delayed Recall                             | 14/16                | 69         |
| CVLT Delayed Recog                                 | 15/16                | 32         |
| Phonemic Fluency****                               | 51                   | 69         |
| Semantic Fluency****                               | 20                   | 21         |
| Boston Naming                                      | 55                   | 46         |

\*Wechsler D (1999) *WASI Manual* (The Psychological Corporation, San Antonio, TX).

\*\*Wechsler D (1997) *WMS-III Administration and Scoring Manual* (The Psychological Corporation, San Antonio, TX).

\*\*\*Delis DC, Kramer JH, Kaplan E, Ober BA (2000) *California Verbal Learning Test-Second Edition, Adult Version* (The Psychological Corporation, San Antonio, TX).

\*\*\*\*Strauss E, Sherman EMS, Spreen O (2006) *A Compendium of Neuropsychological Tests* (Oxford University Press, New York), 3rd Ed.
