# Supplementary material
Source: PubMed Central journal article supplement (PMC2042215)
Supplement: pnas_0705273104_2.pdf [file pnas_0705273104_2.pdf]

**Table 2. Results of volumetric analyses for NB's temporal-lobe lesion**

|                           | <b>Structure</b>                                                                                            |           |                   |                   |                       |
|---------------------------|-------------------------------------------------------------------------------------------------------------|-----------|-------------------|-------------------|-----------------------|
|                           | Hippocampus                                                                                                 | Amygdala  | Perirhinal Cortex | Entorhinal Cortex | Parahippocampal Gyrus |
|                           | <b>Standardized volumes of MTL structures in NB (mm<sup>3</sup>)</b>                                        |           |                   |                   |                       |
| Left                      | 3103                                                                                                        | 255       | 877               | 646               | 1576                  |
| Right                     | 3758                                                                                                        | 1477      | 1547              | 1574              | 1575                  |
|                           | <b>Left-sided volume as proportion of total volume (left + right volume) for NB as compared to controls</b> |           |                   |                   |                       |
| NB                        | 0.45                                                                                                        | 0.15      | 0.36              | 0.29              | 0.50                  |
| Mean Controls             | 0.49                                                                                                        | 0.50      | 0.49              | 0.48              | 0.47                  |
| Range Controls            | 0.47-0.50                                                                                                   | 0.47-0.56 | 0.46-0.55         | 0.39-0.54         | 0.38-0.53             |
| NB (expressed as z-score) | -2.7                                                                                                        | -13.7     | -4.7              | -3.8              | 0.8                   |
