# Supplementary material
Source: PubMed Central journal article supplement (PMC2042215)
Supplement: pnas_0705273104_3.pdf [file pnas_0705273104_3.pdf]

**Table 3. Raw data for NB and control subjects in Experiment 2**

|              | <b>Remember</b> |              | <b>Know</b> |              | <b>Guess</b> |              | Correct Rejections | Misses |
|--------------|-----------------|--------------|-------------|--------------|--------------|--------------|--------------------|--------|
|              | Hits            | False Alarms | Hits        | False Alarms | Hits         | False Alarms |                    |        |
| 1            | 68              | 1            | 29          | 4            | 25           | 8            | 87                 | 78     |
| 2            | 10              | 1            | 39          | 5            | 44           | 20           | 74                 | 107    |
| 3            | 86              | 0            | 18          | 0            | 5            | 2            | 98                 | 91     |
| 4            | 36              | 0            | 21          | 0            | 41           | 7            | 93                 | 102    |
| 5            | 65              | 1            | 16          | 0            | 20           | 1            | 98                 | 99     |
| 6            | 77              | 2            | 53          | 8            | 6            | 2            | 88                 | 64     |
| 7            | 14              | 1            | 37          | 2            | 40           | 16           | 81                 | 109    |
| 8            | 62              | 0            | 27          | 0            | 23           | 5            | 95                 | 88     |
| 9            | 41              | 0            | 4           | 0            | 9            | 0            | 100                | 146    |
| 10           | 35              | 0            | 25          | 0            | 6            | 0            | 100                | 134    |
| 11           | 77              | 2            | 53          | 8            | 6            | 2            | 88                 | 64     |
| 12           | 29              | 0            | 13          | 0            | 42           | 4            | 96                 | 116    |
| NB           | 89              | 1            | 24          | 9            | 3            | 0            | 90                 | 84     |
| Control Mean | 50.0            | 0.7          | 27.9        | 2.3          | 22.3         | 5.6          | 91.5               | 99.8   |
| Control SD   | 25.7            | 0.8          | 15.2        | 3.2          | 16.0         | 6.4          | 8.1                | 25.2   |
| NB Z-Score   | 1.5             | 0.4          | -0.3        | 2.1          | -1.2         | -0.9         | -0.2               | -0.6   |
